# Supplementary material
Source: PubMed Central journal article supplement (PMC10119355)
Supplement: 13311_2022_1304_MOESM2_ESM.pdf [file 13311_2022_1304_MOESM2_ESM.pdf]

**Table S1 Explanation of how the Lafora Epilepsy Severity Scale (LESS) is graded and the severity of patients is determined**

**Lafora Epilepsy Severity Scale (LESS) (Score: 0-90)**

Based on last year/6 months

**1: Generalized tonic-clonic seizures**

- 0 = 1 every 121-360 days (4 months - 1 year)
- 2 = 1 every 61-120 days (2 - 4 months)
- 4 = 1 every 31-60 days (1 - 2 months)
- 6 = 1 every 8-30 days
- 8 = 1 every 2-7 days
- 10 = 1 or more seizure per day

**2: Myoclonus at rest**

- 0 = never
- 4 = sometimes
- 6 = most of the time
- 10 = continuous

**3: Action myoclonus**

- 0 = never
- 4 = sometimes
- 6 = most of the time
- 10 = continuous

**4: Gait**

- 0 = normal gait
- 2 = clumsy gait, but still able to run
- 4 = clumsy gait, not able to run
- 6 = sometimes needs help
- 8 = unable to walk without continuous support
- 10 = wheelchair-bound or bedridden state

**5: Mental status**

- 0 = no cognitive impairment
- 5 = mild to moderate cognitive impairment (difficulties in school/work, memory problems, mild bradypsychia)
- 10 = severe cognitive impairment (no longer able to attend to school/work due to memory/executive problems)

**6: Speech**

- 0 = normal
- 2 = sometimes prolonged response latency
- 4 = always prolonged response latency, frequent anomia
- 6 = only able to say short sentences
- 8 = only able to say few words
- 10 = no longer able to speak

## 7: Basic Activities of Daily Living (ADL):

### A) Dressing

0 = none of the time

2 = a little of the time (needs help 20% of the time)

4 = some of the time (needs help 40% of the time)

6 = a good bit of the time (needs help 60% of the time)

8 = most of the time (needs help 80% of the time)

10 = all of the time (needs help 100% of the time)

### B) Personal hygiene (grooming)

0 = none of the time

2 = a little of the time (needs help 20% of the time)

4 = some of the time (needs help 40% of the time)

6 = a good bit of the time (needs help 60% of the time)

8 = most of the time (needs help 80% of the time)

10 = all of the time (needs help 100% of the time)

### C) Eating

0 = none of the time

2 = a little of the time (needs help 20% of the time)

4 = some of the time (needs help 40% of the time)

6 = a good bit of the time (needs help 60% of the time)

8 = most of the time (needs help 80% of the time)

10 = all of the time (needs help 100% of the time)
