# Supplementary material
Source: PubMed Central journal article supplement (PMC10119355)
Supplement: 13311_2022_1304_MOESM3_ESM.pdf [file 13311_2022_1304_MOESM3_ESM.pdf]

**Table S2** Disclosure of LESS score obtained from each follow-up of patients treated with metformin (a) or without it (b) included in the study

**a**

| BASELINE |              |                   |                  |      |               |        |               |                       |             |                |
|----------|--------------|-------------------|------------------|------|---------------|--------|---------------|-----------------------|-------------|----------------|
| Patient  | GTC seizures | Myoclonus at rest | Action myoclonus | Gait | Mental status | Speech | ADL: dressing | ADL: personal hygiene | ADL: eating | TOTAL Baseline |
| P1       | 0            | 4                 | 6                | 4    | 5             | 2      | 4             | 0                     | 0           | 25             |
| P2       | 8            | 4                 | 6                | 8    | 10            | 4      | 8             | 10                    | 6           | 64             |
| P3       | 0            | 0                 | 0                | 0    | 0             | 0      | 0             | 0                     | 0           | 0              |
| P4       | 6            | 4                 | 6                | 2    | 10            | 6      | 8             | 10                    | 2           | 54             |
| P5       | 0            | 0                 | 0                | 0    | 0             | 0      | 0             | 0                     | 0           | 0              |
| P6       | 6            | 0                 | 4                | 6    | 10            | 6      | 6             | 6                     | 2           | 46             |
| P7       | 0            | 0                 | 0                | 0    | 5             | 0      | 0             | 0                     | 0           | 5              |
| P8       | 6            | 0                 | 4                | 4    | 10            | 4      | 8             | 8                     | 6           | 50             |

| MONTH 6 |              |                   |                  |      |               |        |               |                       |             |          |
|---------|--------------|-------------------|------------------|------|---------------|--------|---------------|-----------------------|-------------|----------|
| Patient | GTC seizures | Myoclonus at rest | Action myoclonus | Gait | Mental status | Speech | ADL: dressing | ADL: personal hygiene | ADL: eating | TOTAL M6 |
| P1      | 0            | 4                 | 6                | 4    | 5             | 4      | 6             | 0                     | 0           | 29       |
| P2      | 8            | 4                 | 6                | 8    | 10            | 6      | 8             | 10                    | 6           | 66       |
| P3      | 0            | 0                 | 0                | 0    | 0             | 0      | 0             | 0                     | 0           | 0        |
| P4      | 6            | 4                 | 6                | 4    | 10            | 6      | 8             | 10                    | 2           | 56       |
| P5      | 0            | 0                 | 0                | 0    | 0             | 0      | 0             | 0                     | 0           | 0        |
| P6      | 2            | 0                 | 4                | 6    | 10            | 6      | 6             | 6                     | 2           | 42       |
| P7      | 0            | 0                 | 0                | 0    | 5             | 0      | 0             | 0                     | 0           | 5        |
| P8      | 6            | 0                 | 4                | 4    | 10            | 4      | 10            | 10                    | 6           | 54       |

| MONTH 12 |              |                   |                  |      |               |        |               |                       |             |           |
|----------|--------------|-------------------|------------------|------|---------------|--------|---------------|-----------------------|-------------|-----------|
| Patient  | GTC seizures | Myoclonus at rest | Action myoclonus | Gait | Mental status | Speech | ADL: dressing | ADL: personal hygiene | ADL: eating | TOTAL M12 |
| P1       | 0            | 4                 | 6                | 6    | 10            | 4      | 4             | 0                     | 2           | 36        |
| P2       | 8            | 4                 | 6                | 8    | 10            | 6      | 10            | 10                    | 8           | 70        |
| P3       | 2            | 0                 | 0                | 0    | 0             | 0      | 0             | 0                     | 0           | 2         |
| P4       | 6            | 4                 | 10               | 4    | 10            | 6      | 8             | 10                    | 2           | 60        |
| P5       | 0            | 0                 | 0                | 0    | 5             | 0      | 0             | 0                     | 0           | 5         |
| P6       | 0            | 0                 | 4                | 6    | 10            | 6      | 6             | 6                     | 2           | 40        |
| P7       | 0            | 0                 | 4                | 0    | 5             | 0      | 0             | 0                     | 0           | 9         |
| P8       | 6            | 0                 | 4                | 4    | 10            | 4      | 10            | 10                    | 6           | 54        |



**b**

| BASELINE |              |                   |                  |      |               |        |               |                       |             |                |
|----------|--------------|-------------------|------------------|------|---------------|--------|---------------|-----------------------|-------------|----------------|
| Patient  | GTC seizures | Myoclonus at rest | Action myoclonus | Gait | Mental status | Speech | ADL: dressing | ADL: personal hygiene | ADL: eating | TOTAL Baseline |
| P9       | 8            | 6                 | 6                | 2    | 10            | 4      | 2             | 2                     | 0           | 40             |
| P10      | 8            | 4                 | 4                | 2    | 10            | 2      | 2             | 0                     | 0           | 32             |
| P11      | 6            | 0                 | 6                | 8    | 10            | 6      | 6             | 8                     | 10          | 60             |
| P12      | 8            | 0                 | 4                | 2    | 10            | 2      | 4             | 4                     | 2           | 36             |
| P13      | 8            | 0                 | 0                | 0    | 10            | 0      | 0             | 0                     | 0           | 18             |
| P14      | 8            | 0                 | 4                | 2    | 10            | 4      | 6             | 2                     | 2           | 38             |
| P15      | 4            | 0                 | 4                | 4    | 5             | 2      | 2             | 10                    | 0           | 31             |
| P16      | 6            | 0                 | 4                | 4    | 10            | 2      | 0             | 0                     | 0           | 26             |
| P17      | 2            | 0                 | 0                | 0    | 0             | 0      | 0             | 0                     | 0           | 2              |
| P18      | 6            | 0                 | 4                | 4    | 10            | 2      | 6             | 2                     | 0           | 34             |

| MONTH 6 |              |                   |                  |      |               |        |               |                       |             |          |
|---------|--------------|-------------------|------------------|------|---------------|--------|---------------|-----------------------|-------------|----------|
| Patient | GTC seizures | Myoclonus at rest | Action myoclonus | Gait | Mental status | Speech | ADL: dressing | ADL: personal hygiene | ADL: eating | TOTAL M6 |
| P9      | 8            | 6                 | 6                | 2    | 10            | 4      | 2             | 2                     | 0           | 40       |
| P10     | 8            | 4                 | 4                | 2    | 10            | 2      | 2             | 2                     | 0           | 34       |
| P11     | 6            | 0                 | 6                | 8    | 10            | 6      | 6             | 8                     | 10          | 60       |
| P12     | 8            | 0                 | 4                | 4    | 10            | 4      | 4             | 4                     | 2           | 40       |
| P13     | 6            | 0                 | 0                | 0    | 10            | 0      | 0             | 0                     | 0           | 16       |
| P14     | 8            | 0                 | 6                | 10   | 10            | 6      | 10            | 10                    | 10          | 70       |
| P15     | 4            | 0                 | 4                | 4    | 5             | 2      | 2             | 10                    | 0           | 31       |
| P16     | 2            | 0                 | 4                | 4    | 10            | 2      | 0             | 0                     | 0           | 22       |
| P17     | 2            | 0                 | 0                | 0    | 0             | 2      | 0             | 0                     | 0           | 4        |
| P18     | 6            | 0                 | 4                | 10   | 10            | 6      | 10            | 10                    | 10          | 66       |

| MONTH 12 |              |                   |                  |      |               |        |               |                       |             |           |
|----------|--------------|-------------------|------------------|------|---------------|--------|---------------|-----------------------|-------------|-----------|
| Patient  | GTC seizures | Myoclonus at rest | Action myoclonus | Gait | Mental status | Speech | ADL: dressing | ADL: personal hygiene | ADL: eating | TOTAL M12 |
| P9       | 8            | 6                 | 6                | 6    | 10            | 6      | 6             | 4                     | 2           | 54        |
| P10      | 6            | 4                 | 4                | 2    | 10            | 4      | 2             | 2                     | 0           | 34        |
| P11      | 6            | 0                 | 6                | 8    | 10            | 6      | 6             | 8                     | 10          | 60        |
| P12      | 6            | 0                 | 4                | 8    | 10            | 6      | 8             | 8                     | 4           | 54        |
| P13      | 6            | 0                 | 4                | 0    | 10            | 2      | 0             | 0                     | 0           | 22        |
| P14      | 6            | 10                | 10               | 10   | 10            | 8      | 10            | 10                    | 10          | 84        |
| P15      | 6            | 0                 | 4                | 4    | 10            | 4      | 2             | 10                    | 2           | 42        |
| P16      | 0            | 4                 | 10               | 4    | 10            | 4      | 2             | 2                     | 2           | 38        |
| P17      | 2            | 0                 | 0                | 0    | 5             | 2      | 0             | 0                     | 0           | 9         |
| P18      | 6            | 0                 | 6                | 8    | 10            | 6      | 10            | 10                    | 10          | 66        |
